# Supplementary material
Source: PubMed Central journal article supplement (PMC10103100)
Supplement: jasn-34-205-s001.pdf [file jasn-34-205-s001.pdf]

Supplemental Material: The cost-effectiveness of hepatitis C virus screening in hemodialysis patients

|                                                                                                              |    |
|--------------------------------------------------------------------------------------------------------------|----|
| Supplemental Table 1: CHEERS 2022 Reporting Checklist.....                                                   | 2  |
| Supplemental Exhibit 1: HEP-CE Model Structure.....                                                          | 6  |
| Supplemental Table 2: Hemodialysis Center Hepatitis C Virus Outbreak Literature Review and Calculations..... | 9  |
| Supplemental Table 3: HCV seropositivity and fibrosis stage data, initial cohort.....                        | 12 |
| Supplemental Figure 1: Calibration Results .....                                                             | 13 |
| Supplemental Table 4: Full list of model parameters .....                                                    | 17 |
| Supplemental Table 5: Breakdown of HCV Testing and Treatment Costs, Base Case Model ....                     | 19 |
| Supplemental Table 6: Comparison of testing using RNA versus antibody testing.....                           | 20 |
| Supplemental Table 7: Additional Sensitivity Analysis Results .....                                          | 21 |
| Supplemental Table 8: Probabilistic Sensitivity Analysis Results .....                                       | 26 |
| Supplemental Figure 2: Probabilistic Sensitivity Analyses Cost Effectiveness Acceptability Curve.....        | 27 |

Supplemental Table 1: CHEERS 2022 Reporting Checklist

| Topic                         | No. | Item                                                                                                                            | Location where item is reported |
|-------------------------------|-----|---------------------------------------------------------------------------------------------------------------------------------|---------------------------------|
| Title                         | 1   | Identify the study as an economic evaluation and specify the interventions being compared.                                      | Title, Page 1                   |
| Abstract                      | 2   | Provide a structured summary that highlights context, key methods, results, and alternative analyses.                           | Abstract, Page 3                |
| Introduction                  |     |                                                                                                                                 |                                 |
| Background and objectives     | 3   | Give the context for the study, the study question, and its practical relevance for decision making in policy or practice.      | Introduction, Last Paragraph    |
| Methods                       |     |                                                                                                                                 |                                 |
| Health economic analysis plan | 4   | Indicate whether a health economic analysis plan was developed and where available.                                             | Methods, Paragraphs 2 and 13    |
| Study population              | 5   | Describe characteristics of the study population (such as age range, demographics, socioeconomic, or clinical characteristics). | Methods, Paragraph 4            |
| Setting and location          | 6   | Provide relevant contextual information that may influence findings.                                                            | Methods, Paragraph 5            |
| Comparators                   | 7   | Describe the interventions or strategies being compared and why chosen.                                                         | Methods, Paragraph 11           |
| Perspective                   | 8   | State the perspective(s) adopted by the study and why chosen.                                                                   | Methods, Paragraph 4            |
| Time horizon                  | 9   | State the time horizon for the study and why appropriate.                                                                       | Methods, Paragraph 11           |

| Topic                                            | No. | Item                                                                                                                                            | Location where item is reported                         |
|--------------------------------------------------|-----|-------------------------------------------------------------------------------------------------------------------------------------------------|---------------------------------------------------------|
| Discount rate                                    | 10  | Report the discount rate(s) and reason chosen.                                                                                                  | Methods, Paragraph 12                                   |
| Selection of outcomes                            | 11  | Describe what outcomes were used as the measure(s) of benefit(s) and harm(s).                                                                   | Methods, Paragraph 13                                   |
| Measurement of outcomes                          | 12  | Describe how outcomes used to capture benefit(s) and harm(s) were measured.                                                                     | Methods, Paragraph 13                                   |
| Valuation of outcomes                            | 13  | Describe the population and methods used to measure and value outcomes.                                                                         | Methods, Paragraph 13                                   |
| Measurement and valuation of resources and costs | 14  | Describe how costs were valued.                                                                                                                 | Methods, Paragraph 12                                   |
| Currency, price date, and conversion             | 15  | Report the dates of the estimated resource quantities and unit costs, plus the currency and year of conversion.                                 | Methods, Paragraph 12                                   |
| Rationale and description of model               | 16  | If modelling is used, describe in detail and why used. Report if the model is publicly available and where it can be accessed.                  | Methods, Paragraph 1-2                                  |
| Analytics and assumptions                        | 17  | Describe any methods for analysing or statistically transforming data, any extrapolation methods, and approaches for validating any model used. | Methods, Paragraphs 4, 5, 7, and Supplemental Materials |
| Characterising heterogeneity                     | 18  | Describe any methods used for estimating how the results of the study vary for subgroups.                                                       | Methods, Last paragraph                                 |
| Characterising distributional effects            | 19  | Describe how impacts are distributed across different individuals or adjustments made to reflect priority populations.                          | Methods, Last paragraph                                 |
| Characterising uncertainty                       | 20  | Describe methods to characterise any sources of uncertainty in the analysis.                                                                    | Methods, Last paragraph                                 |

| Topic                                                                 | No. | Item                                                                                                                                                                          | Location where item is reported |
|-----------------------------------------------------------------------|-----|-------------------------------------------------------------------------------------------------------------------------------------------------------------------------------|---------------------------------|
| Approach to engagement with patients and others affected by the study | 21  | Describe any approaches to engage patients or service recipients, the general public, communities, or stakeholders (such as clinicians or payers) in the design of the study. | Not applicable                  |
| Results                                                               |     |                                                                                                                                                                               |                                 |
| Study parameters                                                      | 22  | Report all analytic inputs (such as values, ranges, references) including uncertainty or distributional assumptions.                                                          | Table 2, Supplemental Materials |
| Summary of main results                                               | 23  | Report the mean values for the main categories of costs and outcomes of interest and summarize them in the most appropriate overall measure.                                  | Results, Paragraph 1            |
| Effect of uncertainty                                                 | 24  | Describe how uncertainty about analytic judgments, inputs, or projections affect findings. Report the effect of choice of discount rate and time horizon, if applicable.      | Results, Paragraphs 2-7         |
| Effect of engagement with patients and others affected by the study   | 25  | Report on any difference patient/service recipient, general public, community, or stakeholder involvement made to the approach or findings of the study                       | Not applicable                  |
| Discussion                                                            |     |                                                                                                                                                                               |                                 |
| Study findings, limitations, generalisability, and current knowledge  | 26  | Report key findings, limitations, ethical or equity considerations not captured, and how these could affect patients, policy, or practice.                                    | Discussion                      |
| Other relevant information                                            |     |                                                                                                                                                                               |                                 |
| Source of funding                                                     | 27  | Describe how the study was funded and any role of the funder in the identification, design, conduct, and reporting of the analysis                                            | End of manuscript               |

| Topic                 | No. | Item                                                                                                                          | Location where item is reported |
|-----------------------|-----|-------------------------------------------------------------------------------------------------------------------------------|---------------------------------|
| Conflicts of interest | 28  | Report authors conflicts of interest according to journal or International Committee of Medical Journal Editors requirements. | End of manuscript               |

*From:* Husereau D, Drummond M, Augustovski F, et al. Consolidated Health Economic Evaluation Reporting Standards 2022 (CHEERS 2022) Explanation and Elaboration: A Report of the ISPOR CHEERS II Good Practices Task Force. Value Health 2022;25.

[doi:10.1016/j.jval.2021.10.008](https://doi.org/10.1016/j.jval.2021.10.008)

## Supplemental Exhibit 1: HEP-CE Model Structure

### Model Description:

The Hepatitis C Cost Effectiveness (HEP-CE) model is an individual-based stochastic microsimulation model programmed in C++. A cohort of individuals enters the model with a user-programmed age and liver disease (fibrosis) distribution, and injection-drug use, HCV seropositivity, and chronic infection prevalences. These individuals cycle through various health, disease, and care states, accrue costs and utilities (quality-adjusted life years; QALYs), and are exposed to background and HCV-related mortality each one-month cycle. The major disease and care states are represented in the model diagram below with additional detail on modules explained below and on hemodialysis-related HCV outbreaks detailed in Supplemental Table 3. HCV Screening, Linkage, and Treatment:

All individuals who are not already diagnosed with and in care for HCV are exposed to HCV screening at a frequency determined by the strategy programmed (never, one-time, or periodic at a specified interval). Each time an individual is screened for HCV, they accrue testing costs. Testing occurs as reflex testing with HCV antibody followed immediately (the same cycle) by HCV RNA, only if HCV antibody testing is positive. False negative and false positive antibody and RNA tests can occur, at rates according to literature-informed test sensitivity and specificity, respectively. When a hypothetical individual enters the model, he/she has a true HCV infection status assigned, and a flag indicating whether that diagnosis (if positive) is known. Each time he/she is screened for HCV, the model calculates, based on test sensitivity and specificity, whether the test will reveal to the patient and clinician the true infection status, or a false negative/positive. If a false negative, the patient continues to have progression of liver disease until either re-screening with a true positive occurs or they die from liver-related or background mortality. If a false positive occurs, the patient goes on to have further HCV evaluation, including a genotype test. The genotype test should then reveal lack of HCV viremia, and the patient incurs the cost of the additional tests and evaluation and then returns to the susceptible pool and does not continue further in HCV care until the time of a new positive screen, if that occurs again.

If an individual has a positive HCV antibody and RNA on screening, they are then exposed to a probability of linking to care each cycle, and once linked to care they go through additional HCV evaluation including genotype testing, clinical visits, and liver disease (fibrosis) staging evaluation. This evaluation can occur the same cycle an individual is linked to care or can be programmed to take multiple cycles to complete. In this study, we programmed it to take at least 1 cycle (month) to complete. Once fibrosis evaluation is completed, individuals then enter the treatment module. In this module, they are exposed to a likelihood of starting treatment and assigned a treatment course and cost. Individuals can also be lost to follow-up any cycle that they are linked to care and/or in treatment. Once unlinked, they are also exposed to a lower, literature informed re-linkage rate each cycle, or they can be re-linked if they are screened again.

Treated individuals experience a literature-informed probability of completing treatment or withdrawing due to toxicity or a non-toxicity related reason. Those who complete treatment are

exposed to a literature-informed probability of achieving cure, and those who do not complete treatment can still clear spontaneously if within the first 6 months of infection.

#### HCV Infection:

Outside of a programmed hemodialysis center outbreak, HCV infection is possible only through injection drug use. Individuals with current injection drug use experience a monthly probability of HCV infection, and once infected can either spontaneously clear during the first 6 months after infection or can be treated as above.

#### Liver Disease:

Only individuals with HCV infection enter the fibrosis progression module. In the fibrosis progression module, if they have current HCV infection, they experience a monthly probability of their fibrosis advancing to the next stage (F0 to F1, F1 to F2, F2 to F3, F3 to F4, and F4 to decompensated). Once HCV is cured, they remain in the fibrosis stage they reached prior to the last treatment month. If they are re-infected, fibrosis progression resumes. Their fibrosis stage determines their monthly costs due to liver disease, their mortality (higher only for F4 and decompensated stages), and their monthly utilities.

#### Mortality, Costs, Utilities:

Each cycle, each individual is exposed to a risk of background and liver-disease related mortality. For each individual still alive during a given cycle, the model sums the individual's current background healthcare costs with any costs incurred during the cycle from screening, care/treatment, and injection drug use or liver disease-related care. It also multiplies their age- and sex-defined background utility (QALY) by any disease- or treatment-related utilities they incur that cycle – i.e., from HCV infection, a particular fibrosis stage/liver disease, injection drug use, treatment or toxicity.

#### Injection Drug Use:

Individuals begin in one of three injection drug use states: never, current, or former. Once in current injection drug use, they move to former use at a literature-informed, age- and sex-stratified probability each month. Individuals can move into or back into current use from never or former states at a literature-informed probability each month as well. In this study's base case, we assumed no new injection drug use begins while on hemodialysis, so movement only occurs from current to former use states.

Model Diagram:

# HEP-CE Model Diagram

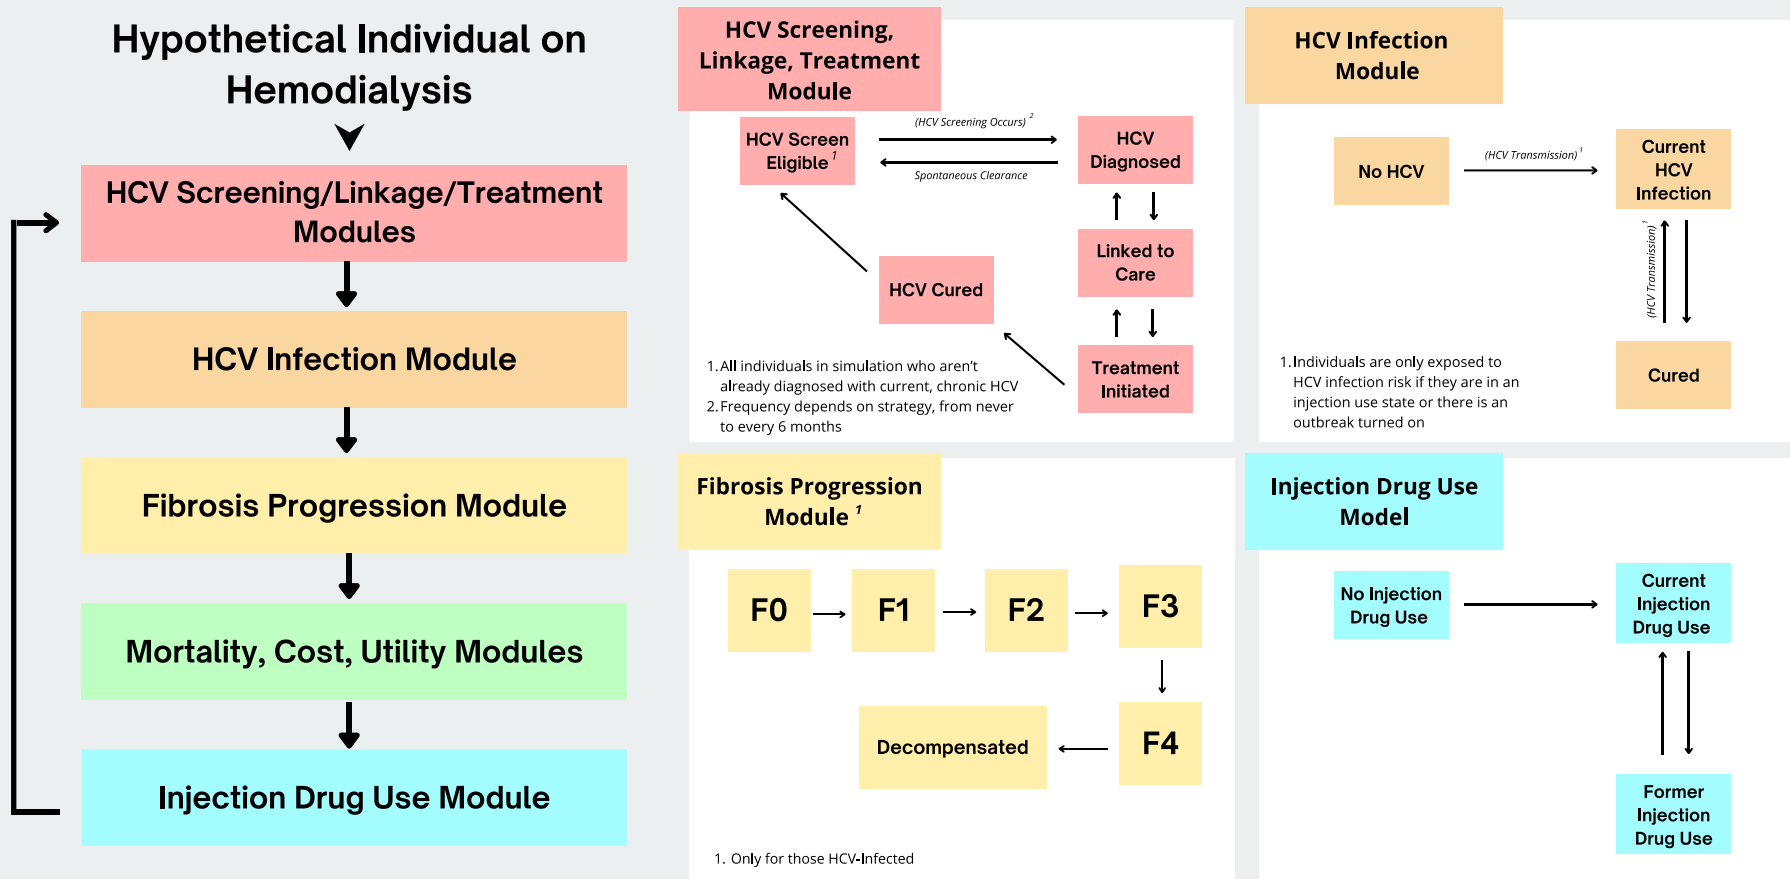



Supplemental Table 2: Hemodialysis Center Hepatitis C Virus Outbreak Literature Review and Calculations

Outbreaks described in literature that detail person-time:

| Description of Source                                                                                                       | N   | HCV cases | Time Period (months) | Person-months followed | Outbreak Rate, monthly | Outbreak Probability, monthly | Source |
|-----------------------------------------------------------------------------------------------------------------------------|-----|-----------|----------------------|------------------------|------------------------|-------------------------------|--------|
| NY State HD center outbreak 2001-2008                                                                                       | 90  | 9         | 88                   | 3590                   | 0.002507               | 0.002504                      | 1      |
| 2016 Cochrane Review of 1 trial that randomized HD centers to dedicated/non-dedicated machines for those with HCV infection | 254 | 4         | 9                    | 2268                   | 0.001764               | 0.001762                      | 2, 3   |
|                                                                                                                             | 192 | 9         | 9                    | 1688                   | 0.005333               | 0.005319                      | 2, 3   |
|                                                                                                                             | 160 | 2         | 9                    | 1431                   | 0.001397               | 0.001397                      | 2, 3   |
|                                                                                                                             | 121 | 7         | 9                    | 1058                   | 0.006619               | 0.006598                      | 2, 3   |
| Mean                                                                                                                        |     |           |                      |                        | 0.0035                 | 0.0035                        |        |

We averaged the HCV incidence rates related to hemodialysis center outbreaks over the described New York state outbreak and the randomized trial arms (initial and subsequent 9 months of follow-up for each trial arm). We assumed all participants in the randomized trial were followed for the duration of the trial as only participants tested at the end of the trial were reported in the results. For the NY state outbreak, we assumed non-case tested individuals at the time of investigation had on average been utilizing the given center for half of the study period, similar to the cases average reported person-time in the center and given average lifespan. The overall mean outbreak HCV incidence was 0.0035 cases/person-month or 4.23 cases per 100 person-years. For sensitivity analyses, we varied this number between the lowest reported HCV incidence rate (0.001397 cases/person-month or 1.68 cases/100 person-years) and 4 times the highest reported incidence rate (0.02648 cases/person-month or 31.8 cases/100 person-years).

Determination of outbreak duration:

We estimated an antibody window period (time between infection and when HCV antibody is detectable on current assays) of 6 months/180 days based on the longest estimates from the literature.<sup>4</sup> We then used half the baseline screening period to account for the index case acquiring infection, on average, halfway through the screening interval (i.e. 6 months in if yearly strategy) and it therefore taking half the screening interval, on average, to pick up the index case. We then assumed that the index case could have transmitted HCV within that time period, and it would take up to 6 months for secondary cases to be detectable by antibody testing (given the window period and an outbreak screening interval of every 3 months). A case is then potentially contagious if the same infection prevention lapses continue until that case is linked to care and treated, which we estimate will take 4 months on average (1 month to make a referral, 2 months to link, complete fibrosis staging, and prior authorization for medications, and 1 month on treatment until viral load is undetectable). Altogether that equates to 16 months plus half the baseline screening interval, for periodic screening intervals as depicted in the formula and table

below. For the non-periodic screening intervals (no testing and testing only at dialysis center entry), we used literature-informed screening durations (multiple lasting approximately 5-7 years with variable screening practices occurring but usually less than guideline-recommended intervals)<sup>5, 6</sup> balanced with overall life-expectancy for the population from our simulations (about 5 years). For the screening at dialysis entry scenario, we assumed a shorter outbreak duration than no screening because of at least baseline known HCV status for an individual identified through likely diagnostic screening after elevated ALT or symptoms or background screening in another setting.

Outbreak Duration Formula:

Outbreak Duration = Antibody window period + 0.5\*Baseline Screening Interval + 2\*Outbreak Screening interval (3 months) + Time from diagnosis until 4 weeks into HCV Treatment, at which point HCV RNA should be undetectable

$$= 6 \text{ months} + 0.5 * \text{Screening Interval (months)} + 6 \text{ months} + 4 \text{ months}$$

Outbreak duration based on Screening Interval:

| Strategy                       | Outbreak Duration |
|--------------------------------|-------------------|
| No Screening                   | 60 months         |
| Screen only at HD Center Entry | 42 months         |
| Screen every 2 years           | 28 months         |
| Screen yearly                  | 22 months         |
| Screen every 6 months          | 19 months         |

Outbreak duration in RNA testing only sensitivity analysis (no 'window period'):

| Strategy                       | Outbreak Duration |
|--------------------------------|-------------------|
| No Screening                   | 54 months         |
| Screen only at HD Center Entry | 36 months         |
| Screen every 2 years           | 22 months         |
| Screen yearly                  | 16 months         |
| Screen every 6 months          | 13 months         |

Outbreak Diagram:

### Modelling of Outbreaks within Hemodialysis (HD) Centers

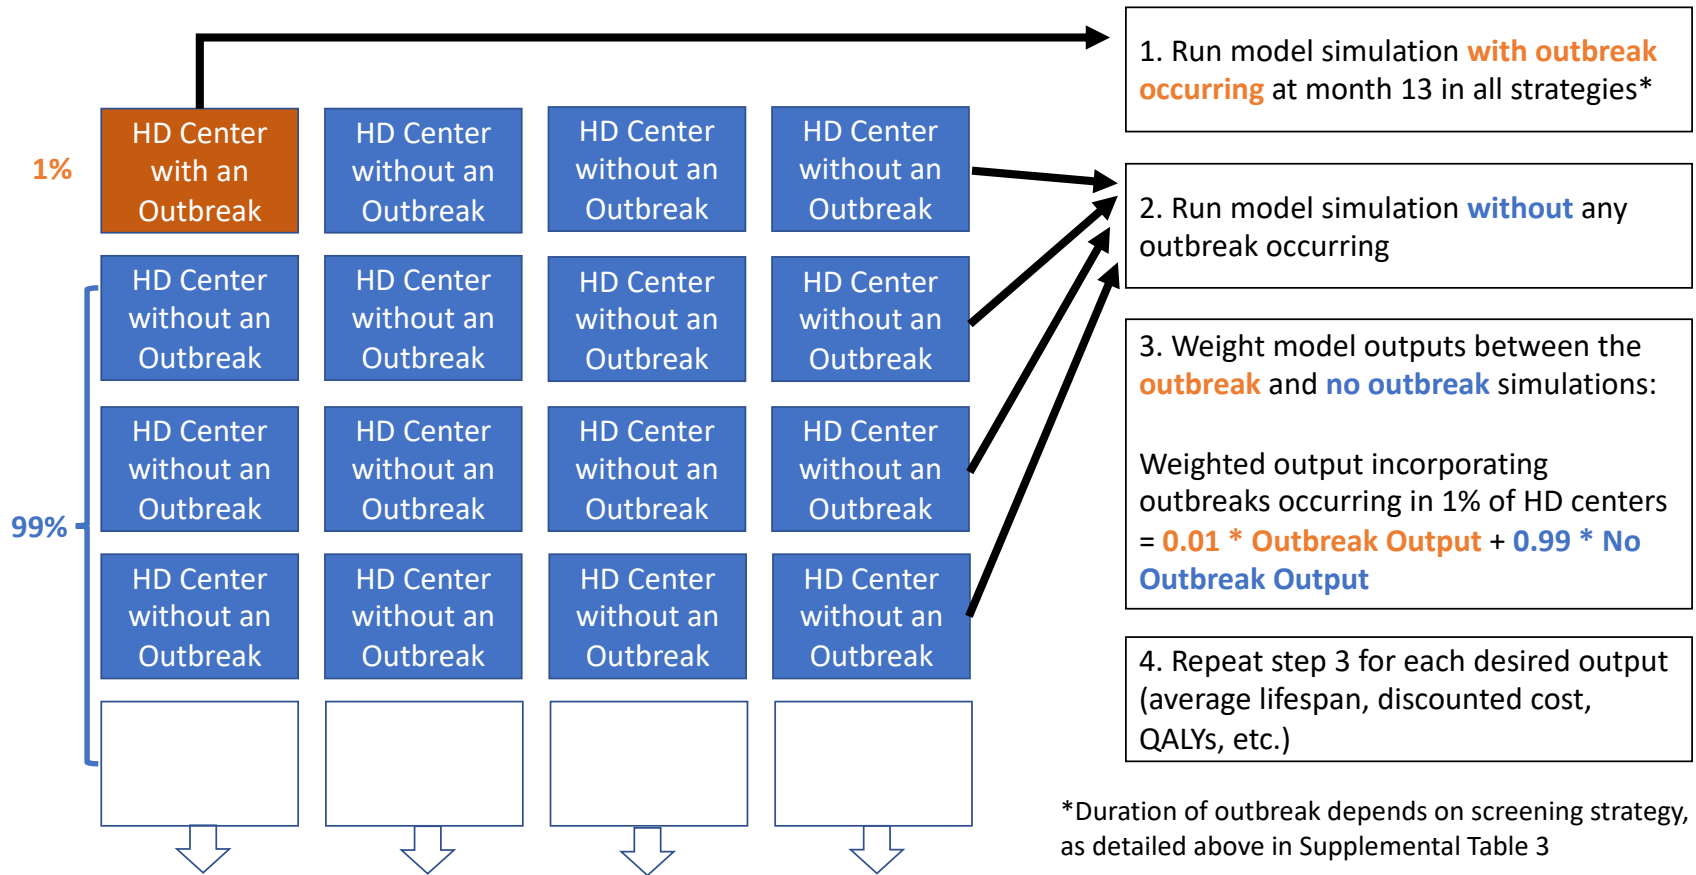

Supplemental Table 3: HCV seropositivity and fibrosis stage data, initial cohort

| Age   | Sex    | Proportion HCV Seropositive |
|-------|--------|-----------------------------|
| 18-24 | male   | 0.01839978                  |
| 18-24 | female | 0.02075406                  |
| 25-29 | male   | 0.03396505                  |
| 25-29 | female | 0.02814523                  |
| 30-34 | male   | 0.04228198                  |
| 30-34 | female | 0.03455368                  |
| 35-39 | male   | 0.05730906                  |
| 35-39 | female | 0.04678727                  |
| 40-44 | male   | 0.08667965                  |
| 40-44 | female | 0.06421291                  |
| 45-49 | male   | 0.13999133                  |
| 45-49 | female | 0.09515614                  |
| 50-54 | male   | 0.18427662                  |
| 50-54 | female | 0.10253617                  |
| 55-59 | male   | 0.17029166                  |
| 55-59 | female | 0.09131393                  |
| 60-64 | male   | 0.11242212                  |
| 60-64 | female | 0.06767342                  |
| 65-69 | male   | 0.06131423                  |
| 65-69 | female | 0.04515619                  |
| 70-74 | male   | 0.03482455                  |
| 70-74 | female | 0.03366514                  |
| 75-79 | male   | 0.02371474                  |
| 75-79 | female | 0.02804273                  |
| 80-84 | male   | 0.01763923                  |
| 80-84 | female | 0.02466199                  |
| 85-99 | male   | 0.01467136                  |
| 85-99 | female | 0.01451613                  |

| Age   | F0   | F1   | F2   | F3   | F4   |
|-------|------|------|------|------|------|
| 18-24 | 0.54 | 0.41 | 0.02 | 0.02 | 0.01 |
| 25-29 | 0.43 | 0.43 | 0.05 | 0.05 | 0.03 |
| 30-39 | 0.43 | 0.43 | 0.06 | 0.06 | 0.03 |
| 40-49 | 0.34 | 0.34 | 0.13 | 0.13 | 0.06 |
| 50-59 | 0.24 | 0.24 | 0.20 | 0.20 | 0.13 |
| 60-69 | 0.17 | 0.17 | 0.23 | 0.23 | 0.20 |
| 70-99 | 0.11 | 0.1  | 0.26 | 0.26 | 0.27 |

Proportions HCV seropositive and with each METAVIR fibrosis stage (F0-F4) calculated from secondary data analysis from Sawinski et. al., 2019.<sup>7</sup> Fibrosis stages based upon Fibrosis-4 (FIB-4) scores, with cutoffs <1.45 for F0-F1, 1.45-3.25 for F2-F3, and >3.25 as F4.

## Supplemental Figure 1: Calibration Results

### A. Modeled Versus Predicted Survival

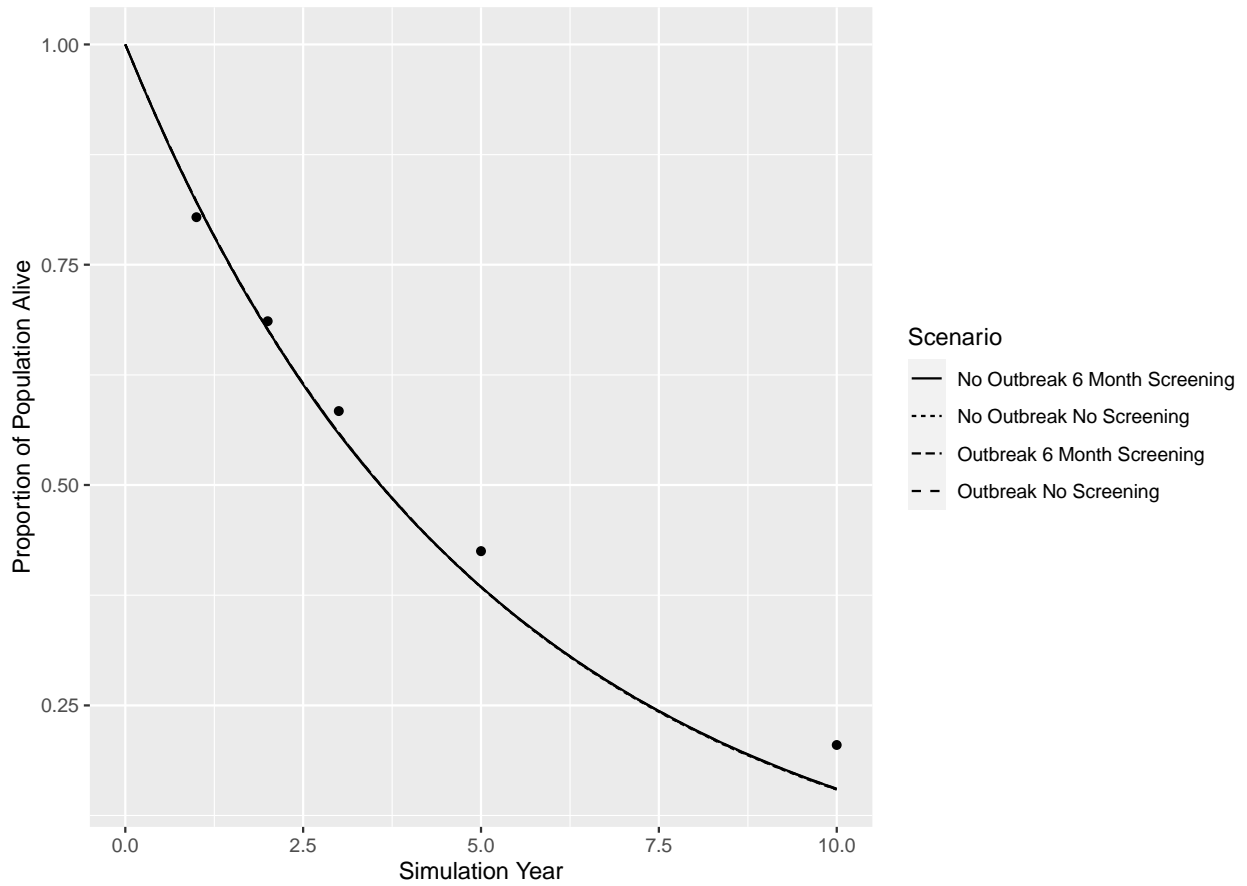

#### Figure Legend:

Lines represent proportion of population still alive in a given time step (month) in the base case simulation (Non screening or treatment and every 6-month screening strategies shown; results are very similar and lines overlap). Dots represent United States Renal Data System (USRDS) 2017 survival data for incident hemodialysis patients entering the USRDS cohort 1, 2, 3, 5, and 10 years before 2017.<sup>11</sup>

## B. Hepatitis C Virus Incidence:

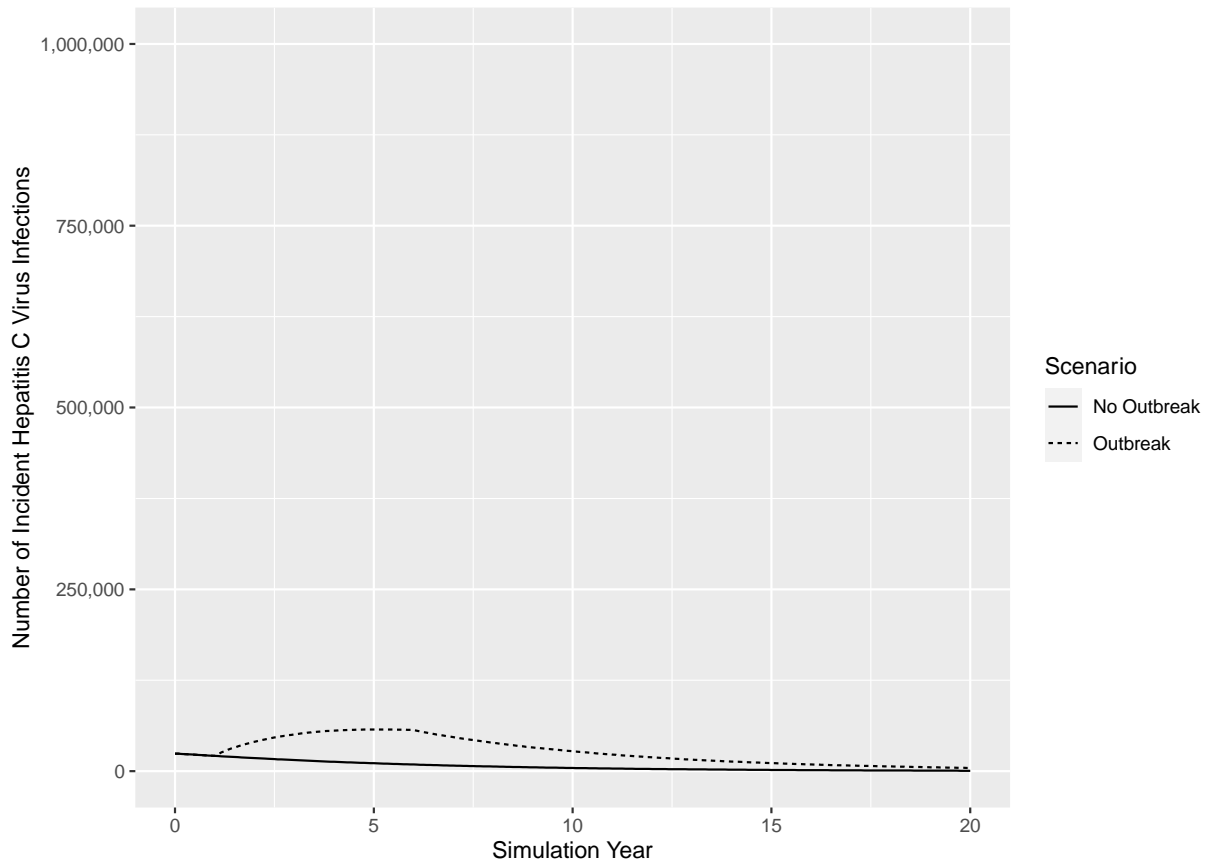

Figure Legend:

Absolute number of new hepatitis C virus (HCV) infections each cycle during outbreak and non-break scenarios in base case simulation, no screening, no treatment strategy with a total cohort size of 1,000,000 hypothetical individuals.

### C. Cirrhosis Cases over Simulation

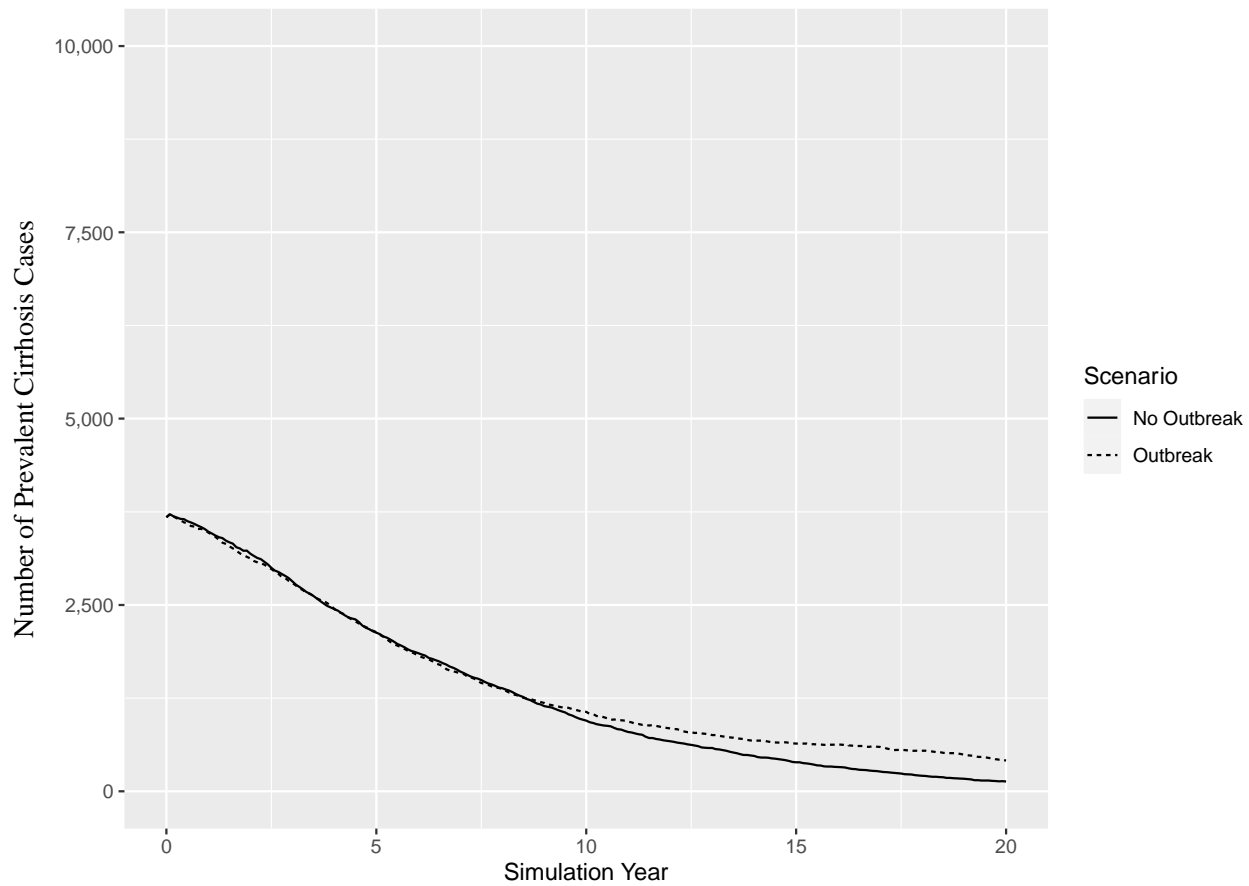

Figure Legend:

Absolute number of cirrhotic individuals each cycle during outbreak and non-break scenarios in base case simulation, no screening, no treatment strategy with a total cohort size of 1,000,000 hypothetical individuals.

#### D. Sample size needed to minimize stochastic variation

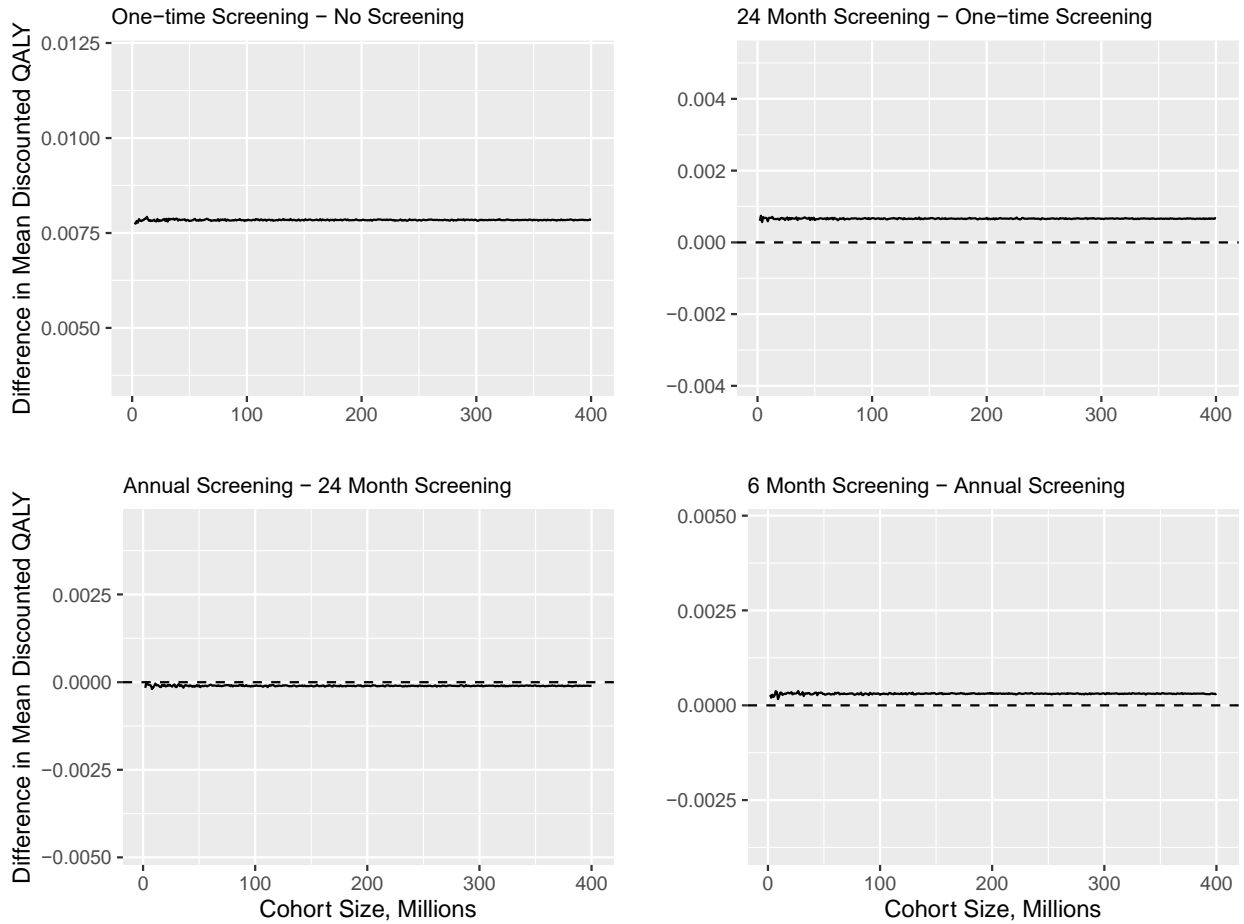

#### Figure Legend:

Panels each demonstrate the difference in mean quality-adjusted life years (QALYs) between the strategies noted when 1000 runs of increasing cohort sizes were used in the base case model simulation, up to a maximum of 400 million. The mean difference is graphed as the solid black line, and purple shaded area represents 95% confidence bands on the mean difference. The dashed black line indicates a mean difference of zero for reference (no difference in QALYs between strategies).

Abbreviations: QALY, quality-adjusted life year



Supplemental Table 4: Full list of model parameters

| Parameter                                                               | Estimate <sup>a</sup>             | Range/Distribution                    | Source                                                           |
|-------------------------------------------------------------------------|-----------------------------------|---------------------------------------|------------------------------------------------------------------|
| <b>Population/Demography:</b>                                           |                                   |                                       |                                                                  |
| Prevalence of Injection Drug Use (IDU)                                  | Current: 0.3%<br>Former: 6.0%     | 0.25-10x baseline current<br>IDU rate | 8-10                                                             |
| Distribution of METAVIR Fibrosis Stage                                  | Varies by age/sex                 | See Supplemental Table 2              | 7                                                                |
| Mean Age (years)                                                        | 63.4                              | 18-99                                 | 11                                                               |
| Chronic HCV Infection                                                   | 2.4%                              | 0-5.4%                                | 7, 12                                                            |
| Background Mortality Rates                                              | Varies by<br>age/sex <sup>b</sup> | 0.5x baseline rates                   | 11                                                               |
| <i>Genotype Prevalence</i>                                              |                                   |                                       | 13                                                               |
| One                                                                     | 0.745                             | --                                    |                                                                  |
| Two                                                                     | 0.102                             | --                                    |                                                                  |
| Three                                                                   | 0.153                             | --                                    |                                                                  |
| <b>Injection Drug Use:</b>                                              |                                   |                                       |                                                                  |
| SMR, former or current IDU                                              | 1.58                              | 1.27-1.67                             | 14                                                               |
| Probability of initiating IDU                                           | 0                                 | 0-0.000358                            | 14                                                               |
| Probability of entering recovery                                        | 0.0139                            | --                                    | 14                                                               |
| Probability of relapsing to current IDU                                 | 0                                 | 0-0.0329                              | 14                                                               |
| <b>HCV Disease:</b>                                                     |                                   |                                       |                                                                  |
| IDU-Related HCV Incidence (cases/100 PY)                                | 12.3                              | 8.5-17.8                              | 15                                                               |
| HD Center Outbreak-Related HCV Incidence<br>(cases/100 PY)              | 4.23                              | 1.68-31.8, Poisson                    | 2, 3, 5                                                          |
| % of HD Centers with an HCV Outbreak                                    | 1%                                | 1-50%                                 | 5                                                                |
| Probability of Clearing Acute Infection                                 | 26%                               | --                                    | 16                                                               |
| <i>Monthly Fibrosis Progression Probability</i>                         |                                   |                                       |                                                                  |
| F0-F1                                                                   | 0.008877                          | --                                    | 17                                                               |
| F1-F2                                                                   | 0.00681                           | --                                    | 17                                                               |
| F2-F3                                                                   | 0.0097026                         | --                                    | 17                                                               |
| F3-F4                                                                   | 0.0096201                         | --                                    | 17                                                               |
| F4-Decompensated Cirrhosis                                              | 0.0097026                         | --                                    | 18                                                               |
| <i>Monthly Cirrhosis Mortality</i>                                      |                                   |                                       |                                                                  |
| F4 (Deaths/100 PY)                                                      | 3                                 | 1-5, Poisson                          | 19                                                               |
| Decompensated Cirrhosis (Deaths/100 PY)                                 | 21                                | 3-30, Poisson                         | 19                                                               |
| Post-SVR Mortality Multiplier:                                          | 0.06                              | 0.01-1                                | 20                                                               |
| <b>Screening and Linkage:</b>                                           |                                   |                                       |                                                                  |
| Background HCV Screening (outside HD)                                   | 0                                 | 0-20.8%                               | 21                                                               |
| Referral to HCV-Specific Care                                           | 95%                               | --                                    | Expert Opinion                                                   |
| Percent of Patients Successfully Linked to and<br>Retained in Treatment | 75%                               | 50-100%                               | 22-28                                                            |
| Monthly Voluntary Relinkage Probability                                 | 50% over 2 years                  | --                                    | Expert Opinion; <sup>29</sup>                                    |
| HCV Antibody Test Sensitivity/Specificity                               | 98%/98%                           | 88 <sup>c</sup> -98%/98-99%, Beta     | <sup>30</sup> , <sup>31</sup> , <sup>32</sup> , <sup>33-35</sup> |
| HCV RNA Test Sensitivity/Specificity                                    | 99.3%/99.9%                       | 98-100%/100%                          | 36                                                               |
| <b>Treatment (Glecaprevir/pibrentasvir 8-week course)</b>               |                                   |                                       |                                                                  |
| Medication Cost                                                         | \$9507.35                         | Gamma                                 | 37                                                               |
| Other Monthly Treatment Costs                                           | \$338.23                          | --                                    | 38                                                               |
| SVR Rate                                                                | 97%                               | --                                    | 39                                                               |
| Toxicity Rate                                                           | 2%                                | --                                    | 39                                                               |

|                                              |                         |               |                 |
|----------------------------------------------|-------------------------|---------------|-----------------|
| Cost of Treatment Toxicity                   | \$224.74                | --            | 38              |
| Utility on treatment                         | 0.99                    | --            | Expert opinion  |
| Utility if experience treatment toxicity     | 0.75                    | 0.5-0.99      | Expert opinion  |
| <b>Utilities:</b>                            |                         |               |                 |
| Background (Hemodialysis)                    | 0.69                    | 0.59-0.80     | 40              |
| Current IDU                                  | 0.681                   | 0.54-0.80     | 41              |
| Former IDU                                   | 0.822                   | 0.71-0.93     | 41              |
| <i>HCV Disease (Active Infection)</i>        |                         |               | 42              |
| F0-F3                                        | 0.94                    | 0.9-1.0       |                 |
| F4                                           | 0.75                    | 0.6-0.9       |                 |
| Decompensated cirrhosis                      | 0.6                     | 0.48-0.75     |                 |
| <i>HCV Disease (Post-SVR)</i>                |                         |               | Expert opinion  |
| F0-F3                                        | 0.97                    | 0.94-1.0      |                 |
| F4                                           | 0.94                    | 0.75-0.97     |                 |
| Decompensated cirrhosis                      | 0.75                    | 0.6-0.94      |                 |
| <b>Costs (USD):</b>                          |                         |               |                 |
| Background Healthcare Costs (HD patients)    | Age- and Sex-stratified | \$7231-\$8289 | 11              |
| Background IDU Costs                         | \$95.99                 | --            | 43              |
| HCV Antibody Test                            | \$15.85                 | Gamma         | 38              |
| HCV RNA Test                                 | \$79.41                 | Gamma         | 38              |
| Fibrosis Staging (Fibroscan)                 | \$127.42                | --            | 38              |
| False-positive Test Result Cost <sup>d</sup> | \$492.63                | --            | 38              |
| <i>HCV Disease (Active Infection)</i>        |                         |               | 44              |
| F0-F2                                        | \$345.54                | --            |                 |
| F3-F4                                        | \$615.58                | --            |                 |
| Decompensated cirrhosis                      | \$1,167.06              | --            |                 |
| <i>HCV Disease (Post-SVR)</i>                |                         |               | Expert Opinion; |
| F0-F2                                        | \$172.77                | --            | assumed to      |
| F3-F4                                        | \$307.79                | --            | decrease by 50% |
| Decompensated cirrhosis                      | \$583.53                | --            | after SVR       |

<sup>a</sup> All probabilities, incidences, and costs are monthly unless otherwise indicated

<sup>b</sup> Based on age- and sex-stratified annual mortality rates from USRDS 2019 Reference Sheet H.8\_1 with overall mortality across all ages of 183.4 deaths per 1000 person-years

<sup>c</sup> Lower antibody sensitivity range represents estimate halfway in between historical low HCV antibody sensitivity estimates<sup>31, 32</sup> and more recent, small studies with sensitivity 94-100% in dialysis patients<sup>33-35</sup>

<sup>d</sup> False positive test costs include an HCV genotype and two established physician visits

Abbreviations: IDU, injection drug use; HCV, hepatitis C virus; SMR, standardized mortality ratio; HD, hemodialysis; PY, person-years; SVR, sustained virologic response (cure); RNA, ribonucleic acid

Supplemental Table 5: Breakdown of HCV Testing and Treatment Costs, Base Case Model

| Strategy                                  | HCV Antibody testing costs per person <sup>a</sup> | HCV RNA testing costs per person <sup>a</sup> | HCV treatment costs per person <sup>a</sup> | HCV treatment toxicity costs per person <sup>a</sup> |
|-------------------------------------------|----------------------------------------------------|-----------------------------------------------|---------------------------------------------|------------------------------------------------------|
| No Screening                              | \$ -                                               | \$ -                                          | \$ -                                        | \$ -                                                 |
| Screen once upon entering dialysis center | \$ 16.90                                           | \$ 9.29                                       | \$ 215.50                                   | \$ 0.05                                              |
| Screen every 2 years                      | \$ 45.46                                           | \$ 34.50                                      | \$ 238.49                                   | \$ 0.05                                              |
| Screen every year                         | \$ 77.58                                           | \$ 79.63                                      | \$ 243.87                                   | \$ 0.05                                              |
| Screen every 6 months                     | \$ 134.22                                          | \$ 211.40                                     | \$ 248.90                                   | \$ 0.05                                              |

<sup>a</sup> All per person costs represent the total number of tests or treatments completed or toxicity events recorded, multiplied by the individual cost per test, treatment, or toxicity (treatment costs include drug costs as well as visit costs for 2 months), divided by the total cohort size (N=200,000,000).

Abbreviations: HCV, hepatitis C virus; RNA, ribonucleic acid

Supplemental Table 6: Comparison of testing using RNA versus antibody testing

| Strategy                                                    | Discounted Cost (\$) | Discounted QALYs | Incremental Cost-Effectiveness Ratio (ICER) |
|-------------------------------------------------------------|----------------------|------------------|---------------------------------------------|
| No Screening                                                | \$ 434,932           | 3.08722          | Reference                                   |
| Base Case: Screen once upon entering dialysis center        | \$ 435,587           | 3.09514          | \$82,739                                    |
| RNA Testing Only: Screen once upon entering dialysis center | \$ 435,637           | 3.09496          | Dominated                                   |
| Base Case: Screen every 2 years                             | \$ 435,680           | 3.09580          | \$140,193                                   |
| Base Case: Screen every year                                | \$ 435,719           | 3.09574          | Dominated                                   |
| RNA Testing Only: Screen every 2 years                      | \$ 435,812           | 3.09555          | Dominated                                   |
| Base Case: Screen every 6 months                            | \$ 435,904           | 3.09604          | \$934,757                                   |
| RNA Testing Only: Screen every year                         | \$ 436,028           | 3.09597          | Dominated                                   |
| RNA Testing Only: Screen every 6 months                     | \$ 436,375           | 3.09600          | Dominated                                   |

| Strategy                                                              | Discounted Cost (\$) | Discounted QALYs | Incremental Cost-Effectiveness Ratio (ICER) |
|-----------------------------------------------------------------------|----------------------|------------------|---------------------------------------------|
| No Screening                                                          | \$ 434,934           | 3.08688          | Reference                                   |
| Lower Ab Sensitivity (88%): Screen once upon entering dialysis center | \$ 435,535           | 3.09603          | \$65,653                                    |
| RNA Testing Only: Screen once upon entering dialysis center           | \$ 435,637           | 3.09496          | Dominated                                   |
| Lower Ab Sensitivity (88%): Screen every 2 years                      | \$ 435,642           | 3.09636          | \$324,554                                   |
| Lower Ab Sensitivity (88%): Screen every year                         | \$ 435,713           | 3.09646          | \$683,807                                   |
| RNA Testing Only: Screen every 2 years                                | \$ 435,812           | 3.09555          | Dominated                                   |
| Lower Ab Sensitivity (88%): Screen every 6 months                     | \$ 435,920           | 3.09611          | Dominated                                   |
| RNA Testing Only: Screen every year                                   | \$ 436,028           | 3.09597          | Dominated                                   |
| RNA Testing Only: Screen every 6 months                               | \$ 436,375           | 3.09600          | Dominated                                   |

Abbreviations: RNA, ribonucleic acid; QALYs, quality-adjusted life years; ICER, incremental cost-effectiveness ratio; Ab, antibody

Supplemental Table 7: Additional Sensitivity Analysis Results

| <b>A. Low HCV Prevalence in Initial Cohort (0%)</b>   |                    |                                         |                                      |                      |                  |                                             |
|-------------------------------------------------------|--------------------|-----------------------------------------|--------------------------------------|----------------------|------------------|---------------------------------------------|
| Strategy                                              | HCV Infections (%) | HCV Infections Identified, Lifetime (%) | SVR Achieved (% of total infections) | Discounted Cost (\$) | Discounted QALYs | Incremental Cost-Effectiveness Ratio (ICER) |
| No Screening                                          | 0.18%              | 0.0%                                    | 0.0%                                 | \$434,865            | 3.0998           | Ref                                         |
| Screen every 2 years                                  | 0.15%              | 74.4%                                   | 64.5%                                | \$434,911            | 3.0997           | Dominated                                   |
| Screen once upon entering dialysis center             | 0.16%              | 46.6%                                   | 39.9%                                | \$434,929            | 3.1001           | \$202,640                                   |
| Screen every year                                     | 0.14%              | 79.4%                                   | 69.4%                                | \$435,010            | 3.1000           | Dominated                                   |
| Screen every 6 months                                 | 0.14%              | 85.0%                                   | 73.8%                                | \$435,132            | 3.0997           | Dominated                                   |
| <b>B. High HCV Prevalence in Initial Cohort (75%)</b> |                    |                                         |                                      |                      |                  |                                             |
| Strategy                                              | HCV Infections (%) | HCV Infections Identified, Lifetime (%) | SVR Achieved (% of total infections) | Discounted Cost (\$) | Discounted QALYs | Incremental Cost-Effectiveness Ratio (ICER) |
| No Screening                                          | 5.56%              | 0.0%                                    | 0.0%                                 | \$434,976            | 3.0711           | Ref                                         |
| Screen once upon entering dialysis center             | 5.54%              | 95.8%                                   | 80.6%                                | \$436,389            | 3.0887           | \$80,413                                    |
| Screen every 2 years                                  | 5.53%              | 98.6%                                   | 89.0%                                | \$436,555            | 3.0902           | \$108,301                                   |
| Screen every year                                     | 5.52%              | 99.1%                                   | 91.2%                                | \$436,692            | 3.0910           | \$174,801                                   |
| Screen every 6 months                                 | 5.52%              | 99.4%                                   | 93.1%                                | \$436,857            | 3.0913           | \$548,326                                   |
| <b>C. Low SMR for Injection Drug Use (1.27)</b>       |                    |                                         |                                      |                      |                  |                                             |
| Strategy                                              | HCV Infections (%) | HCV Infections Identified, Lifetime (%) | SVR Achieved (% of total infections) | Discounted Cost (\$) | Discounted QALYs | Incremental Cost-Effectiveness Ratio (ICER) |
| No Screening                                          | 2.59%              | 0.0%                                    | 0.0%                                 | \$439,148            | 3.1121           | Ref                                         |
| Screen once upon entering dialysis center             | 2.58%              | 94.0%                                   | 79.3%                                | \$439,802            | 3.1201           | \$82,158                                    |
| Screen every 2 years                                  | 2.57%              | 97.8%                                   | 88.4%                                | \$439,914            | 3.1209           | \$136,716                                   |
| Screen every year                                     | 2.56%              | 98.5%                                   | 90.6%                                | \$440,002            | 3.1212           | \$304,076                                   |
| Screen every 6 months                                 | 2.55%              | 99.0%                                   | 92.6%                                | \$440,186            | 3.1215           | \$606,217                                   |
| <b>D. High SMR for Injection Drug Use (1.67)</b>      |                    |                                         |                                      |                      |                  |                                             |
| Strategy                                              | HCV Infections (%) | HCV Infections Identified, Lifetime (%) | SVR Achieved (% of total infections) | Discounted Cost (\$) | Discounted QALYs | Incremental Cost-Effectiveness Ratio (ICER) |

|                                           |       |       |       |           |        |           |
|-------------------------------------------|-------|-------|-------|-----------|--------|-----------|
| No Screening                              | 2.59% | 0.0%  | 0.0%  | \$433,922 | 3.0812 | Ref       |
| Screen once upon entering dialysis center | 2.57% | 94.3% | 79.4% | \$434,536 | 3.0889 | \$80,454  |
| Screen every 2 years                      | 2.56% | 97.8% | 88.2% | \$434,664 | 3.0898 | \$140,428 |
| Screen every year                         | 2.55% | 98.5% | 90.5% | \$434,744 | 3.0900 | \$346,064 |
| Screen every 6 months                     | 2.54% | 99.0% | 92.5% | \$434,870 | 3.0899 | Dominated |

**E. Injection drug use initiation based on literature rates (new initiation and relapse simulated)**

| Strategy                                  | HCV Infections (%) | HCV Infections Identified, Lifetime (%) | SVR Achieved (% of total infections) | Discounted Cost (\$) | Discounted QALYs | Incremental Cost-Effectiveness Ratio (ICER) |
|-------------------------------------------|--------------------|-----------------------------------------|--------------------------------------|----------------------|------------------|---------------------------------------------|
| No Screening                              | 4.48%              | 0.0%                                    | 0.0%                                 | \$433,300            | 3.0467           | Ref                                         |
| Screen once upon entering dialysis center | 4.52%              | 53.8%                                   | 45.3%                                | \$433,949            | 3.0544           | \$84,032                                    |
| Screen every 2 years                      | 4.88%              | 81.0%                                   | 71.9%                                | \$434,171            | 3.0554           | \$218,934                                   |
| Screen every year                         | 4.94%              | 86.0%                                   | 77.3%                                | \$434,299            | 3.0558           | \$307,879                                   |
| Screen every 6 months                     | 5.00%              | 90.7%                                   | 82.0%                                | \$434,570            | 3.0566           | \$361,532                                   |

**F. Low Injection Drug Use-Related HCV Incidence (8.5 cases/100PY)**

| Strategy                                  | HCV Infections (%) | HCV Infections Identified, Lifetime (%) | SVR Achieved (% of total infections) | Discounted Cost (\$) | Discounted QALYs | Incremental Cost-Effectiveness Ratio (ICER) |
|-------------------------------------------|--------------------|-----------------------------------------|--------------------------------------|----------------------|------------------|---------------------------------------------|
| No Screening                              | 2.57%              | 0.0%                                    | 0.0%                                 | \$434,910            | 3.0871           | Ref                                         |
| Screen once upon entering dialysis center | 2.56%              | 94.9%                                   | 79.9%                                | \$435,544            | 3.0949           | \$81,573                                    |
| Screen every 2 years                      | 2.54%              | 98.1%                                   | 88.5%                                | \$435,655            | 3.0957           | \$138,950                                   |
| Screen every year                         | 2.53%              | 98.7%                                   | 90.7%                                | \$435,747            | 3.0960           | \$276,793                                   |
| Screen every 6 months                     | 2.53%              | 99.2%                                   | 92.7%                                | \$435,890            | 3.0960           | \$6,174,977                                 |

**G. High Injection Drug Use-Related HCV Incidence (17.8 cases/100PY)**

| Strategy                                  | HCV Infections (%) | HCV Infections Identified, Lifetime (%) | SVR Achieved (% of total infections) | Discounted Cost (\$) | Discounted QALYs | Incremental Cost-Effectiveness Ratio (ICER) |
|-------------------------------------------|--------------------|-----------------------------------------|--------------------------------------|----------------------|------------------|---------------------------------------------|
| No Screening                              | 2.62%              | 0.0%                                    | 0.0%                                 | \$434,952            | 3.0873           | Ref                                         |
| Screen once upon entering dialysis center | 2.60%              | 93.3%                                   | 78.6%                                | \$435,587            | 3.0951           | \$81,474                                    |
| Screen every 2 years                      | 2.60%              | 97.4%                                   | 87.8%                                | \$435,629            | 3.0954           | \$149,583                                   |
| Screen every year                         | 2.59%              | 98.1%                                   | 90.1%                                | \$435,736            | 3.0958           | \$243,427                                   |
| Screen every 6 months                     | 2.59%              | 98.8%                                   | 92.2%                                | \$435,941            | 3.0962           | \$483,293                                   |

**H. Low HD Center Outbreak-Related HCV Incidence (1.68 cases/100 PY)**

| Strategy                                  | HCV Infections (%) | HCV Infections Identified, Lifetime (%) | SVR Achieved (% of total infections) | Discounted Cost (\$) | Discounted QALYs | Incremental Cost-Effectiveness Ratio (ICER) |
|-------------------------------------------|--------------------|-----------------------------------------|--------------------------------------|----------------------|------------------|---------------------------------------------|
| No Screening                              | 2.53%              | 0.0%                                    | 0.0%                                 | \$434,923            | 3.0873           | Ref                                         |
| Screen once upon entering dialysis center | 2.53%              | 94.3%                                   | 79.4%                                | \$435,575            | 3.0952           | \$82,795                                    |
| Screen every 2 years                      | 2.53%              | 97.9%                                   | 88.4%                                | \$435,671            | 3.0958           | \$147,177                                   |
| Screen every year                         | 2.53%              | 98.6%                                   | 90.7%                                | \$435,712            | 3.0958           | Dominated                                   |
| Screen every 6 months                     | 2.53%              | 99.1%                                   | 92.7%                                | \$435,897            | 3.0961           | \$986,339                                   |

**I. High HD Center Outbreak-Related HCV Incidence (31.8 cases/100 PY)**

| Strategy                                  | HCV Infections (%) | HCV Infections Identified, Lifetime (%) | SVR Achieved (% of total infections) | Discounted Cost (\$) | Discounted QALYs | Incremental Cost-Effectiveness Ratio (ICER) |
|-------------------------------------------|--------------------|-----------------------------------------|--------------------------------------|----------------------|------------------|---------------------------------------------|
| No Screening                              | 3.01%              | 0.0%                                    | 0.0%                                 | \$434,992            | 3.0866           | Ref                                         |
| Screen once upon entering dialysis center | 3.09%              | 92.9%                                   | 78.7%                                | \$435,695            | 3.0948           | \$86,128                                    |
| Screen every 2 years                      | 2.94%              | 96.8%                                   | 87.0%                                | \$435,766            | 3.0955           | \$96,486                                    |
| Screen every year                         | 2.87%              | 97.6%                                   | 89.2%                                | \$435,793            | 3.0955           | Dominated                                   |
| Screen every 6 months                     | 2.83%              | 98.2%                                   | 91.2%                                | \$435,969            | 3.0958           | \$691,330                                   |

**J. Low Cirrhosis Mortality Estimate (1 case/100PY for F4, 3 cases/100PY for decompensated cirrhotics)**

| Strategy                                  | HCV Infections (%) | HCV Infections Identified, Lifetime (%) | SVR Achieved (% of total infections) | Discounted Cost (\$) | Discounted QALYs | Incremental Cost-Effectiveness Ratio (ICER) |
|-------------------------------------------|--------------------|-----------------------------------------|--------------------------------------|----------------------|------------------|---------------------------------------------|
| No Screening                              | 2.59%              | 0.0%                                    | 0.0%                                 | \$435,413            | 3.0891           | Ref                                         |
| Screen once upon entering dialysis center | 2.58%              | 94.2%                                   | 79.4%                                | \$435,635            | 3.0952           | \$36,199                                    |
| Screen every 2 years                      | 2.57%              | 97.8%                                   | 88.5%                                | \$435,731            | 3.0961           | \$113,170                                   |
| Screen every year                         | 2.56%              | 98.5%                                   | 90.7%                                | \$435,748            | 3.0959           | Dominated                                   |
| Screen every 6 months                     | 2.55%              | 99.0%                                   | 92.7%                                | \$435,964            | 3.0964           | \$673,136                                   |

**K. High Cirrhosis Mortality Estimate (5 cases/100PY for F4, 30 cases/100PY for decompensated cirrhosis; no improvement in mortality post-SVR)**

| Strategy     | HCV Infections (%) | HCV Infections Identified, Lifetime (%) | SVR Achieved (% of total infections) | Discounted Cost (\$) | Discounted QALYs | Incremental Cost-Effectiveness Ratio (ICER) |
|--------------|--------------------|-----------------------------------------|--------------------------------------|----------------------|------------------|---------------------------------------------|
| No Screening | 2.59%              | 0.0%                                    | 0.0%                                 | \$434,752            | 3.0865           | Ref                                         |

|                                                                                     |                    |                                         |                                      |                      |                  |                                             |
|-------------------------------------------------------------------------------------|--------------------|-----------------------------------------|--------------------------------------|----------------------|------------------|---------------------------------------------|
| Screen once upon entering dialysis center                                           | 2.58%              | 94.2%                                   | 79.2%                                | \$435,236            | 3.0929           | \$75,329                                    |
| Screen every 2 years                                                                | 2.57%              | 97.8%                                   | 88.0%                                | \$435,344            | 3.0937           | \$147,155                                   |
| Screen every year                                                                   | 2.56%              | 98.5%                                   | 90.4%                                | \$435,403            | 3.0938           | \$708,005                                   |
| Screen every 6 months                                                               | 2.55%              | 99.0%                                   | 92.4%                                | \$435,646            | 3.0945           | \$343,574                                   |
| <b>L. Background HCV Screening Simulated (20.8% over 5 years)</b>                   |                    |                                         |                                      |                      |                  |                                             |
| Strategy                                                                            | HCV Infections (%) | HCV Infections Identified, Lifetime (%) | SVR Achieved (% of total infections) | Discounted Cost (\$) | Discounted QALYs | Incremental Cost-Effectiveness Ratio (ICER) |
| No Screening                                                                        | 2.59%              | 20.3%                                   | 17.2%                                | \$435,060            | 3.0886           | Ref                                         |
| Screen once upon entering dialysis center                                           | 2.58%              | 95.1%                                   | 81.7%                                | \$435,593            | 3.0952           | \$81,388                                    |
| Screen every 2 years                                                                | 2.57%              | 97.8%                                   | 88.4%                                | \$435,643            | 3.0955           | \$153,458                                   |
| Screen every year                                                                   | 2.56%              | 98.5%                                   | 90.6%                                | \$435,756            | 3.0960           | \$249,146                                   |
| Screen every 6 months                                                               | 2.55%              | 99.0%                                   | 92.6%                                | \$435,905            | 3.0960           | \$3,852,721                                 |
| <b>M. HCV Antibody and RNA Test Cost Lower Estimate (25th% Gamma Distribution)</b>  |                    |                                         |                                      |                      |                  |                                             |
|                                                                                     | HCV Infections (%) | HCV Infections Identified, Lifetime (%) | SVR Achieved (% of total infections) | Discounted Cost (\$) | Discounted QALYs | Incremental Cost-Effectiveness Ratio (ICER) |
| No Screening                                                                        | 2.57%              | 0.00%                                   | 0.0%                                 | \$435,268            | 3.0892           | Ref                                         |
| Screen once upon entering dialysis center                                           | 2.55%              | 94.20%                                  | 79.3%                                | \$435,907            | 3.0970           | \$82,144                                    |
| Screen every 2 years                                                                | 2.54%              | 97.82%                                  | 88.2%                                | \$436,070            | 3.0982           | \$135,548                                   |
| Screen every year                                                                   | 2.53%              | 98.49%                                  | 90.5%                                | \$436,111            | 3.0982           | Dominated                                   |
| Screen every 6 months                                                               | 2.53%              | 99.01%                                  | 92.5%                                | \$436,275            | 3.0985           | \$688,031                                   |
| <b>N. HCV Antibody and RNA Test Cost Higher Estimate (75th% Gamma Distribution)</b> |                    |                                         |                                      |                      |                  |                                             |
|                                                                                     | HCV Infections (%) | HCV Infections Identified, Lifetime (%) | SVR Achieved (% of total infections) | Discounted Cost (\$) | Discounted QALYs | Incremental Cost-Effectiveness Ratio (ICER) |
| No Screening                                                                        | 2.57%              | 0.00%                                   | 0.0%                                 | \$435,265            | 3.0892           | Ref                                         |
| Screen once upon entering dialysis center                                           | 2.55%              | 94.22%                                  | 79.4%                                | \$435,937            | 3.0972           | \$84,412                                    |
| Screen every 2 years                                                                | 2.54%              | 97.83%                                  | 88.2%                                | \$436,069            | 3.0981           | \$147,171                                   |
| Screen every year                                                                   | 2.53%              | 98.50%                                  | 90.5%                                | \$436,188            | 3.0985           | \$269,120                                   |
| Screen every 6 months                                                               | 2.53%              | 99.02%                                  | 92.5%                                | \$436,305            | 3.0982           | Dominated                                   |



Abbreviations: HCV, hepatitis C virus; SVR, sustained virologic response (cure); QALYs, quality-adjusted life years; ICER, incremental cost-effectiveness ratio; SMR, standardized mortality ratio; HD, hemodialysis

Supplemental Table 8: Probabilistic Sensitivity Analysis Results

| <b>Strategy</b>                           | <b>Median Average Lifespan</b> | <b>95% Confidence Estimates</b> | <b>Median Average Discounted Cost</b> | <b>95% Confidence Estimates</b> | <b>Median Average Discounted QALYs</b> | <b>95% Confidence Estimates</b> | <b>Incremental Cost-Effectiveness Ratio (ICER)</b> |
|-------------------------------------------|--------------------------------|---------------------------------|---------------------------------------|---------------------------------|----------------------------------------|---------------------------------|----------------------------------------------------|
| No Screening                              | 5.2242                         | (5.2150, 5.2332)                | \$ 435,308                            | (\$434,611, \$435,989)          | 3.0895                                 | (3.0846, 3.0942)                | --                                                 |
| Screen once upon entering dialysis center | 5.2311                         | (5.2221, 5.2396)                | \$ 435,940                            | (\$435,304, \$436,577)          | 3.0973                                 | (3.0926, 3.1018)                | \$81,472                                           |
| Screen every 2 years                      | 5.2315                         | (5.2232, 5.2405)                | \$ 436,043                            | (\$435,381, \$436,707)          | 3.0979                                 | (3.0933, 3.1026)                | \$162,795                                          |
| Screen every year                         | 5.2317                         | (5.2232, 5.2401)                | \$ 436,131                            | (\$435,494, \$436,762)          | 3.0982                                 | (3.0937, 3.1027)                | \$315,644                                          |
| Screen every 6 months                     | 5.2318                         | (5.2233, 5.2404)                | \$ 436,293                            | (\$435,640, \$436,943)          | 3.0983                                 | (3.0937, 3.103)                 | \$900,024                                          |

Abbreviations: HCV, hepatitis C virus; QALYs, quality-adjusted life years; ICER, incremental cost-effectiveness ratio

Supplemental Figure 2: Probabilistic Sensitivity Analyses Cost Effectiveness Acceptability Curve

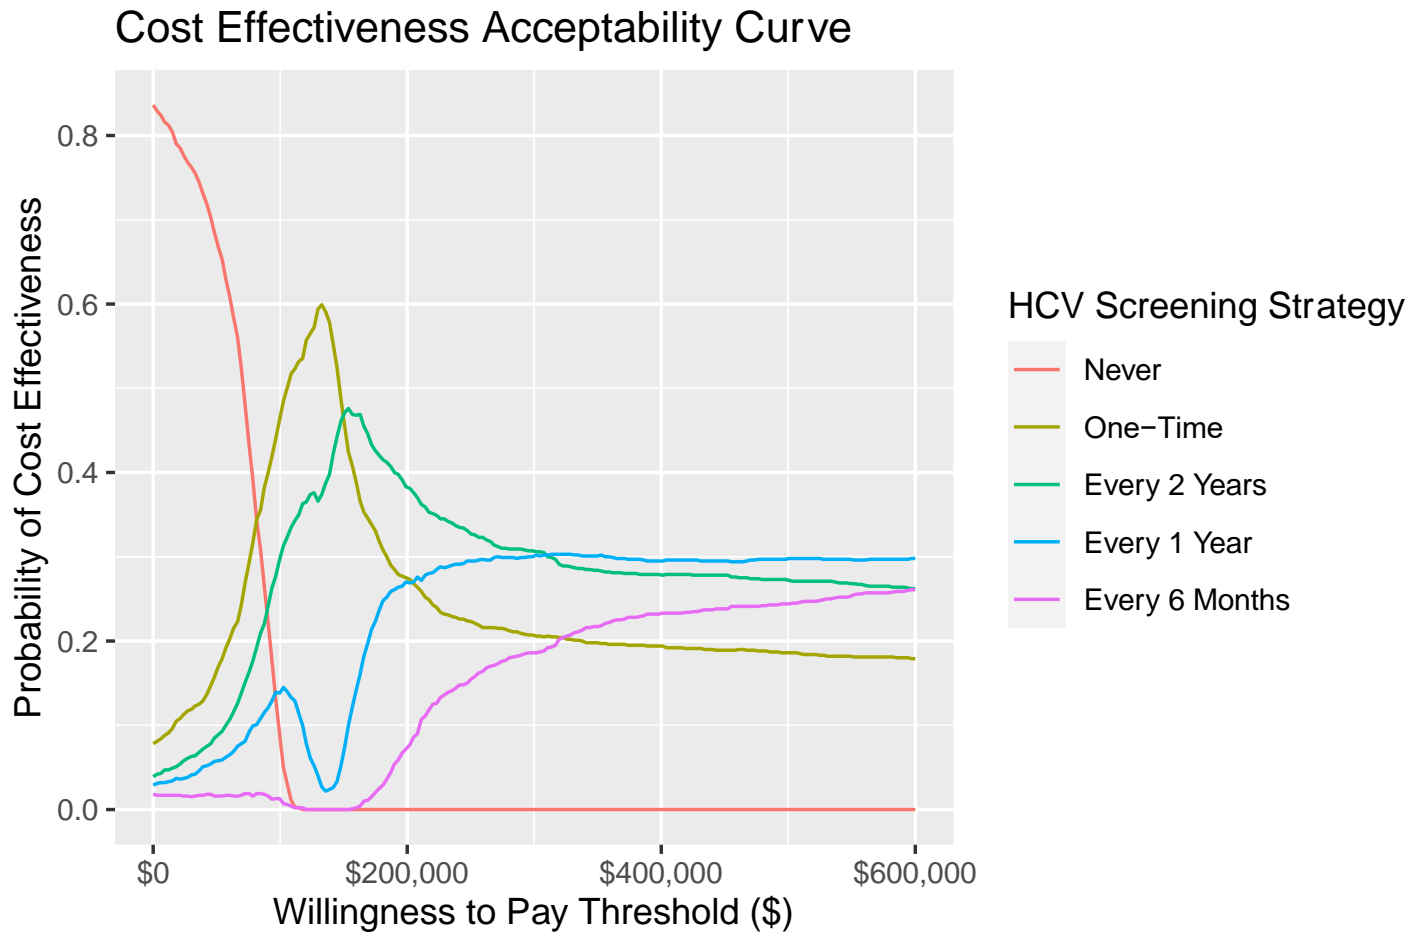

Figure Legend:

This graph represents the cost effectiveness acceptability curve (CEAC) for the probabilistic sensitivity analysis varying several parameters (HCV antibody and RNA test cost, treatment cost, outbreak-related HCV incidence, mortality from cirrhosis, and antibody and RNA test sensitivity and specificity). The x-axis is the willingness-to-pay threshold in \$US and the y-axis is the probability that a given strategy will be the ‘winner’ at the corresponding willingness-to-pay threshold: the strategy that yields the highest number of quality adjusted life years (QALYs) for a cost under the willingness-to-pay threshold. The probability was determined by doing 1000 runs, each with a different set of parameters drawn from the probability distributions noted in Supplemental Table 5, and then calculating the strategy with the highest net monetary benefit (NMB;  $NMB = QALYs\ gained * willingness-to-pay\ threshold - incremental\ costs\ comparing\ each\ strategy\ to\ the\ next\ least\ expensive,\ non-dominated\ strategy$ ) at each willingness-to-pay threshold.

## Appendix References:

1. (CDC) CfDCaP: Hepatitis C virus transmission at an outpatient hemodialysis unit--New York, 2001-2008. *MMWR Morb Mortal Wkly Rep*, 58: 189-194, 2009
2. Bravo Zuñiga JI, Loza Munárriz C, López-Alcalde J: Isolation as a strategy for controlling the transmission of hepatitis C virus (HCV) infection in haemodialysis units. *Cochrane Database Syst Rev*: CD006420, 2016 10.1002/14651858.CD006420.pub2
3. Shamshirsaz AA, Kamgar M, Bekheirnia MR, Ayazi F, Hashemi SR, Bouzari N, et al.: The role of hemodialysis machines dedication in reducing Hepatitis C transmission in the dialysis setting in Iran: a multicenter prospective interventional study. *BMC Nephrol*, 5: 13, 2004 10.1186/1471-2369-5-13
4. Alter MJ, LRLT, Jerome I.; Miller, Elaine R.; Arduino, Matthew J.; Agodoa, Lawrence Y.C.; Neuland, Carolyn Y.: Recommendations for Preventing Transmission of Infections Among Chronic Hemodialysis Patients. *Mortality and Morbidity Weekly Report*, 50: 1-43, 2001
5. Centers for Disease C, Prevention: Health care-Associated Hepatitis B and C Outbreaks ( $\geq 2$  cases) Reported to the CDC 2008-2019. 2021
6. Janneh MD, Tran J, Cantu G, Chung WM: Knowledge and Practices of Hepatitis Screening and Infection Control in County Outpatient Hemodialysis Facilities. *21st Annual Scientific Meeting of the Society for Healthcare Epidemiology of America*. Dallas, Texas, 2011
7. Sawinski D, Forde KA, Lo Re V, Goldberg DS, Cohen JB, Locke JE, et al.: Mortality and Kidney Transplantation Outcomes Among Hepatitis C Virus-Seropositive Maintenance Dialysis Patients: A Retrospective Cohort Study. *Am J Kidney Dis*, 73: 815-826, 2019 10.1053/j.ajkd.2018.11.009
8. Assoumou SA, Nolen S, Hagan L, Wang J, Eftekhari Yazdi G, Thompson WW, et al.: Hepatitis C Management at Federally Qualified Health Centers during the Opioid Epidemic: A Cost-Effectiveness Study. *The American Journal of Medicine*, 2020 10.1016/j.amjmed.2020.05.029
9. Assoumou SA, Wang J, Nolen S, Eftekhari Yazdi G, Mayer KH, Puro J, et al.: HCV Testing and Treatment in a National Sample of US Federally Qualified Health Centers during the Opioid Epidemic. *J GEN INTERN MED*, 35: 1477-1483, 2020 10.1007/s11606-020-05701-9
10. Barocas JA, Savinkina A, Lodi S, Epstein RL, Bouton TC, Sperring H, et al.: Projected long-term impact of the COVID-19 pandemic on hepatitis C outcomes in the United States: a modelling study. *Clinical Infectious Diseases*, 2021 10.1093/cid/ciab779
11. Center USRDSC: United States Renal Data System, Available at: <https://usrds.org/>. Accessed 2020
12. Finelli L, Miller JT, Tokars JI, Alter MJ, Arduino MJ: National surveillance of dialysis-associated diseases in the United States, 2002. *Semin Dial*, 18: 52-61, 2005 10.1111/j.1525-139X.2005.18108.x
13. Petruzzello A, Marigliano S, Loquercio G, Cozzolino A, Cacciapuoti C: Global epidemiology of hepatitis C virus infection: An up-date of the distribution and circulation of hepatitis C virus genotypes. *World J Gastroenterol*, 22: 7824-7840, 2016 10.3748/wjg.v22.i34.7824

14. Grubbs V, Vittighoff E, Grimes B, Johansen KL: Mortality and illicit drug dependence among hemodialysis patients in the United States: a retrospective cohort analysis. *BMC Nephrol*, 17: 56, 2016 10.1186/s12882-016-0271-1
15. Sacks-Davis R, Grebely J, Dore GJ, Osburn W, Cox AL, Rice TM, et al.: Hepatitis C Virus Reinfection and Spontaneous Clearance of Reinfection--the InC3 Study. *J Infect Dis*, 212: 1407-1419, 2015 10.1093/infdis/jiv220
16. Grebely J, Prins M, Hellard M, Cox AL, Osburn WO, Lauer G, et al.: Hepatitis C virus clearance, reinfection, and persistence, with insights from studies of injecting drug users: towards a vaccine. *Lancet Infect Dis*, 12: 408-414, 2012 10.1016/S1473-3099(12)70010-5
17. Erman A, Krahn MD, Hansen T, Wong J, Bielecki JM, Feld JJ, et al.: Estimation of fibrosis progression rates for chronic hepatitis C: a systematic review and meta-analysis update. *BMJ Open*, 9, 2019 10.1136/bmjopen-2018-027491
18. Smith DJ, Combellick J, Jordan AE, Hagan H: Hepatitis C virus (HCV) disease progression in people who inject drugs (PWID): A systematic review and meta-analysis. *The International journal on drug policy*, 26: 911-921, 2015 10.1016/j.drugpo.2015.07.004
19. Bruno S, Zuin M, Crosignani A, Rossi S, Zadra F, Roffi L, et al.: Predicting Mortality Risk in Patients With Compensated HCV-Induced Cirrhosis: A Long-Term Prospective Study. *American Journal of Gastroenterology*, 104: 1147-1158, 2009
20. van der Meer AJ, Veldt BJ, Feld JJ, Wedemeyer H, Dufour JF, Lammert F, et al.: Association between sustained virological response and all-cause mortality among patients with chronic hepatitis C and advanced hepatic fibrosis. *Jama*, 308: 2584-2593, 2012 10.1001/jama.2012.144878
21. Patzer RE, McPherson L, Wang Z, Plantinga LC, Paul S, Ellis M, et al.: Dialysis facility referral and start of evaluation for kidney transplantation among patients treated with dialysis in the Southeastern United States. *Am J Transplant*, 20: 2113-2125, 2020 10.1111/ajt.15791
22. Coyle C, Moorman AC, Bartholomew T, Klein G, Kwakwa H, Mehta SH, et al.: The HCV care continuum: linkage to HCV care and treatment among patients at an urban health network, Philadelphia, PA. *Hepatology*, 2019 10.1002/hep.30501
23. Tsui JI, Miller CM, Scott JD, Corcorran MA, Dombrowski JC, Glick SN: Hepatitis C Continuum of Care and Utilization of Healthcare and Harm Reduction Services among Persons who Inject Drugs in Seattle. *Drug and Alcohol Dependence*, 195: 114-120, 2019 10.1016/j.drugalcdep.2018.11.026
24. Scott J, Fagalde M, Baer A, Glick S, Barash E, Armstrong H, et al.: A Population-Based Intervention to Improve Care Cascades of Patients With Hepatitis C Virus Infection. *Hepatology*, 5: 387-399, 2020 10.1002/hep4.1627
25. Dupont SC, Fluker S-A, Quairola KM, Body C, Okosun I, Lom J, et al.: Improved Hepatitis C Cure Cascade Outcomes Among Urban Baby Boomers in the Direct-Acting Antiviral Era. *Public Health Rep*, 135: 107-113, 2019 10.1177/0033354919888228
26. Konerman MA, Thomson M, Gray K, Moore M, Choxi H, Seif E, et al.: Impact of an Electronic Health Record Alert in Primary Care on Increasing Hepatitis C Screening and Curative Treatment for Baby Boomers. *Hepatology*, 66: 1805-1813, 2017 10.1002/hep.29362

27. Reader SW, Kim H-s, El-Serag HB, Thrift AP: Persistent Challenges in the Hepatitis C Virus Care Continuum for Patients in a Central Texas Public Health System. *Open Forum Infect Dis*, 7, 2020 10.1093/ofid/ofaa322
28. Calner P, Sperring H, Ruiz-Mercado G, Miller NS, Andry C, Battisti L, et al.: HCV screening, linkage to care, and treatment patterns at different sites across one academic medical center. *PLOS ONE*, 14: e0218388, 2019 10.1371/journal.pone.0218388
29. Viner K, Kuncio D, Newbern EC, Johnson CC: The continuum of hepatitis C testing and care. *Hepatology*, 61: 783-789, 2015 10.1002/hep.27584
30. Tang W, Chen W, Amini A, Boeras D, Falconer J, Kelly H, et al.: Diagnostic accuracy of tests to detect Hepatitis C antibody: a meta-analysis and review of the literature. *BMC Infect Dis*, 17: 695, 2017 10.1186/s12879-017-2773-2
31. Sakamoto N, Enomoto N, Marumo F, Sato C: Prevalence of hepatitis C virus infection among long-term hemodialysis patients: detection of hepatitis C virus RNA in plasma. *J Med Virol*, 39: 11-15, 1993 10.1002/jmv.1890390104
32. Pereira BJ, Levey AS: Hepatitis C virus infection in dialysis and renal transplantation. *Kidney Int*, 51: 981-999, 1997 10.1038/ki.1997.139
33. Papadopoulos N, Griveas I, Sveroni E, Argiana V, Kalliaropoulos A, Martinez-Gonzalez B, et al.: HCV viraemia in anti-HCV-negative haemodialysis patients: Do we need HCV RNA detection test? *Int J Artif Organs*, 41: 168-170, 2018 10.1177/0391398817752326
34. Vidales-Braz BM, da Silva NM, Lobato R, Germano FN, da Mota LD, Barros EJ, et al.: Detection of hepatitis C virus in patients with terminal renal disease undergoing dialysis in southern Brazil: prevalence, risk factors, genotypes, and viral load dynamics in hemodialysis patients. *Virol J*, 12: 8, 2015 10.1186/s12985-015-0238-z
35. Konstantinidou EI, Kontekaki EG, Kefas A, Konstantinidis T, Romanidou G, Fotiadou E, et al.: The prevalence of HCV RNA positivity in anti-HCV antibodies-negative hemodialysis patients in Thrace Region. Multicentral study. *Germs*, 11: 52-58, 2021 10.18683/germs.2021.1240
36. Schalasta G, Speicher A, Börner A, Enders M: Performance of the New Aptima HCV Quant Dx Assay in Comparison to the Cobas TaqMan HCV2 Test for Use with the High Pure System in Detection and Quantification of Hepatitis C Virus RNA in Plasma or Serum. *Journal of Clinical Microbiology*, 54: 1101-1107, 2016 10.1128/JCM.03236-15
37. U.S. Department of Veterans Affairs: Pharmaceutical Prices, Available at: <https://www.va.gov/oal/business/fss/pharmPrices.asp>.
38. Health Do, Services Ha: Clinical Laboratory Fee Schedule Files 2020, Available at: <https://www.cms.gov/medicare/medicare-fee-service-payment/clinicallabfeesched/clinical-laboratory-fee-schedule-files/20clabq2>. Accessed 2020-12-15
39. Lawitz E, Flisiak R, Abunimeh M, Sise ME, Park JY, Kaskas M, et al.: Efficacy and safety of glecaprevir/pibrentasvir in renally impaired patients with chronic HCV infection. *Liver Int*, 40: 1032-1041, 2020 10.1111/liv.14320
40. Wylid M, Morton RL, Hayen A, Howard K, Webster AC: A systematic review and meta-analysis of utility-based quality of life in chronic kidney disease treatments. *PLoS Med*, 9: e1001307, 2012 10.1371/journal.pmed.1001307

41. Pyne JM, French M, McCollister K, Tripathi S, Rapp R, Booth B: Preference-weighted health-related quality of life measures and substance use disorder severity. *Addiction*, 103: 1320-1329, 2008 10.1111/j.1360-0443.2008.02153.x
42. Sullivan PW, Ghushchyan V: Preference-Based EQ-5D Index Scores for Chronic Conditions in the United States. *Med Decis Making*, 26: 410-420, 2006 10.1177/0272989X06290495
43. Coffin PO, Sullivan SD: Cost-Effectiveness of Distributing Naloxone to Heroin Users for Lay Overdose Reversal. *Annals of Internal Medicine*, 158: 1-9, 2013 10.7326/0003-4819-158-1-201301010-00003
44. Davis KL, Mitra D, Medjedovic J, Beam C, Rustgi V: Direct economic burden of chronic hepatitis C virus in a United States managed care population. *Journal of Clinical Gastroenterology*, 45: e17-24, 2011 10.1097/MCG.0b013e3181e12c09
45. Neumann PJ, Cohen JT, Weinstein MC: Updating Cost-Effectiveness — The Curious Resilience of the \$50,000-per-QALY Threshold. *New England Journal of Medicine*, 371: 796-797, 2014 10.1056/NEJMp1405158
